# Supplementary material for: NF-κB–inducing kinase plays an essential T cell–intrinsic role in graft-versus-host disease and lethal autoimmunity in mice
Source: JCI journal article supplement (doi:10.1172/jci44943), 2011-11-01
Supplement: sd1 [file 1]

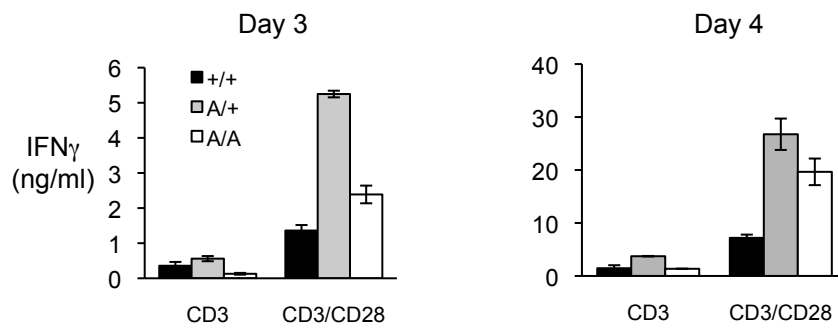

**Supplemental Figure 1**

Naïve *aly/aly* T cells produce IFN $\gamma$  upon IL-12 stimulation. Sorted naïve CD4 T cells were stimulated for 3 or 4 days with anti-CD3, anti-CD28, and IL-12. Culture supernatant was assessed for IFN $\gamma$  by ELISA.

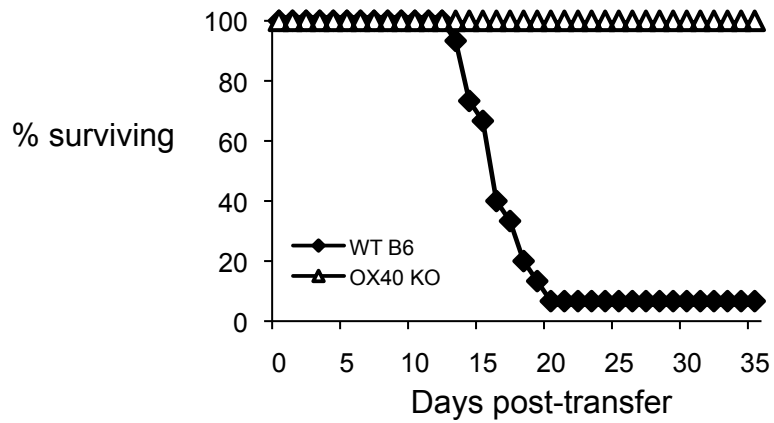

**Supplemental Figure 2**

OX40<sup>-/-</sup> CD4 T cells do not cause lethal GVHD.  $1 \times 10^6$  sorted naïve CD4 T cells from OX40<sup>-/-</sup> or WT mice were injected intravenously into sublethally irradiated (bm12 x CD45.1)F1 recipients.

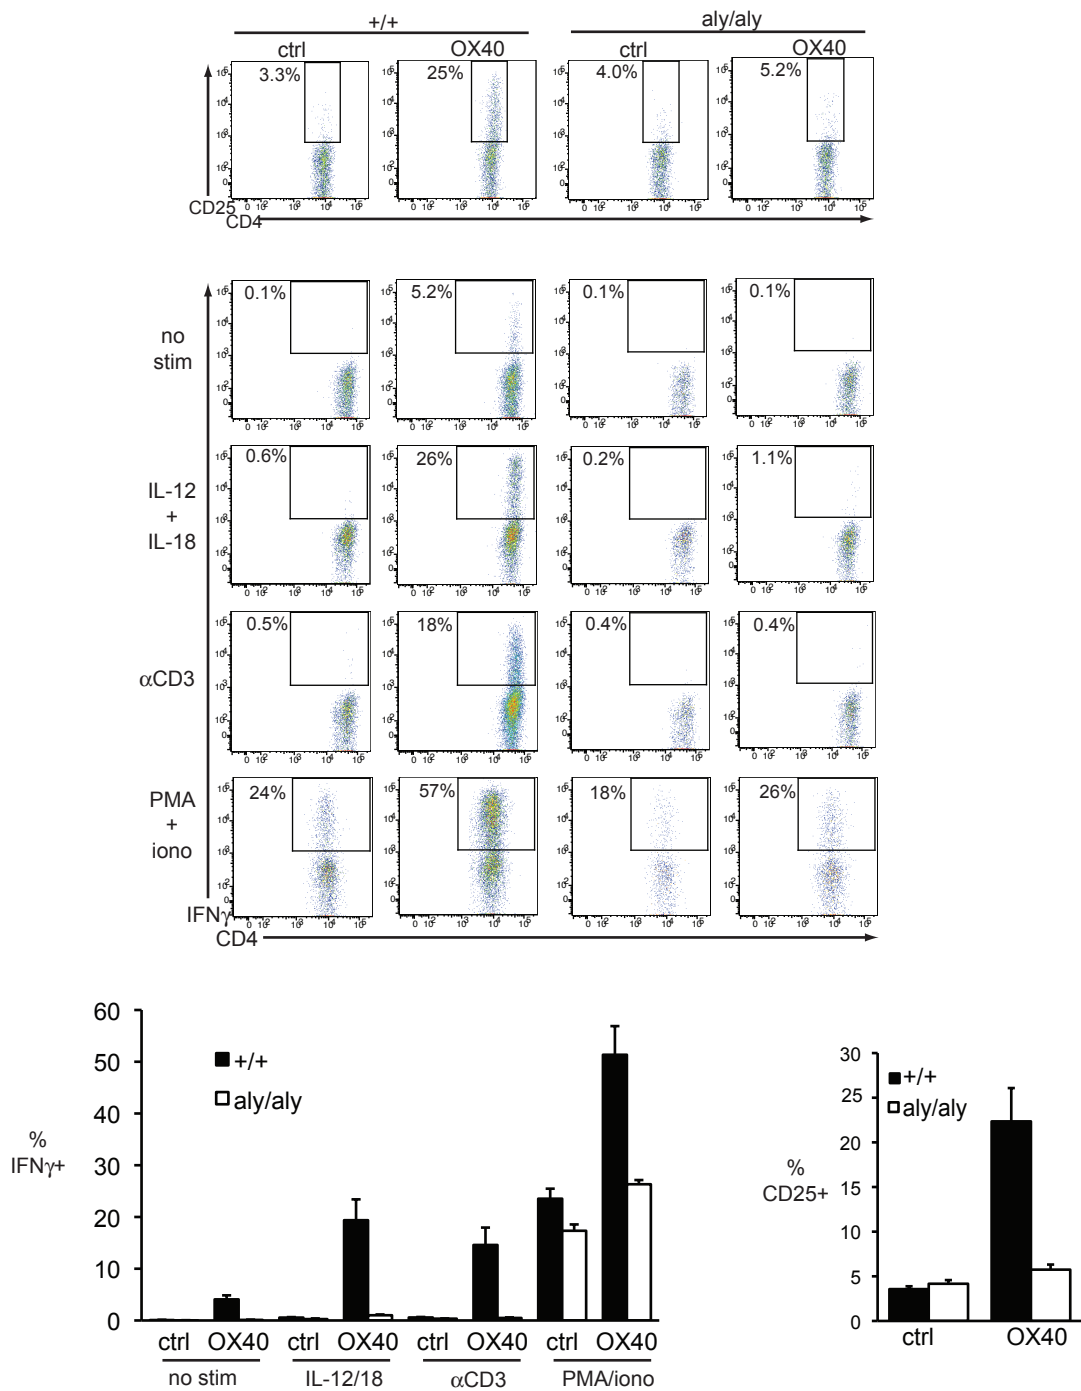

### Supplemental Figure 3

NIK-deficient T cells that develop in a NIK-sufficient thymus do not respond to OX40 signaling in a GVHD model. Lethally irradiated B6.CD45.1 mice were reconstituted with *aly/aly* or *+/+* BM. After reconstitution, *aly/aly* or *+/+* naïve CD4 T cells were sorted from these BM chimeras and  $3 \times 10^6$  cells were transferred along with 50 ug control antibody or agonist anti-OX40 into unirradiated (bm12 x CD45.1)F1 recipients. Five days later, recipient spleens were harvested and donor cells were assessed directly ex vivo for CD25 expression and assessed for IFN $\gamma$  secretion upon 5 hour in vitro stimulation.

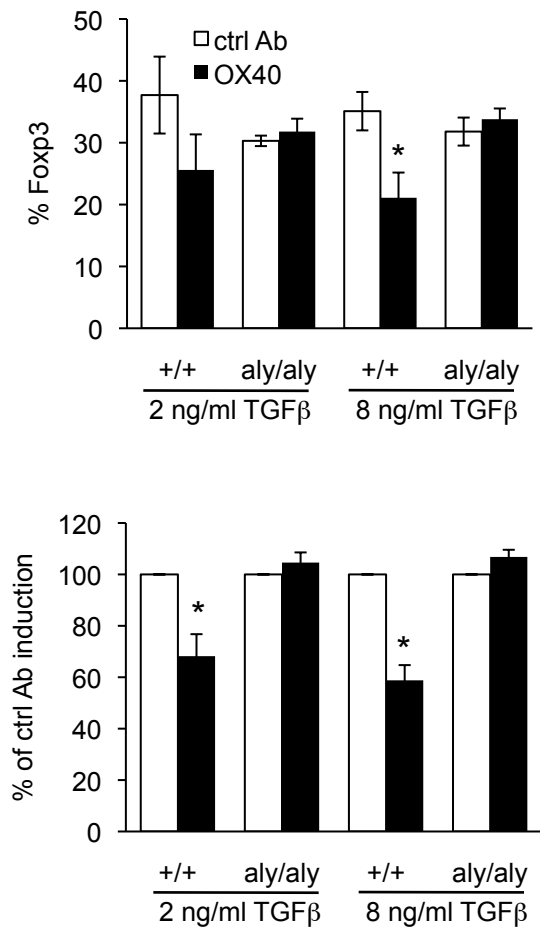

#### Supplemental Figure 4

OX40 stimulation does not inhibit iT<sub>reg</sub> induction in NIK-deficient CD4 T cells. Magnetically purified CD4 T cells from *aly/aly* or control *+/+* mice (n=3 mice/group) were cultured under iT<sub>reg</sub> conditions for 3 days with agonist anti-OX40 or control antibody and then assessed by flow cytometry for Foxp3 induction. \*p<0.05 versus control antibody.

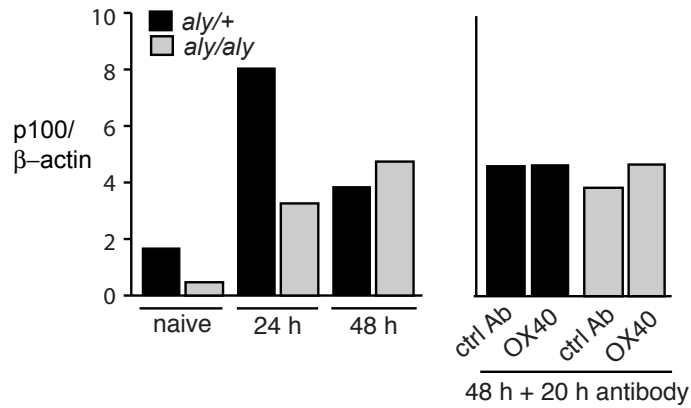

**Supplemental Figure 5**

p100 quantitation in *aly/aly* and control *aly/+* T cells stimulated *in vitro* with anti-CD3 plus anti-CD28 and anti-OX40 or control antibody. Data are from the experiment depicted in Figure 4.

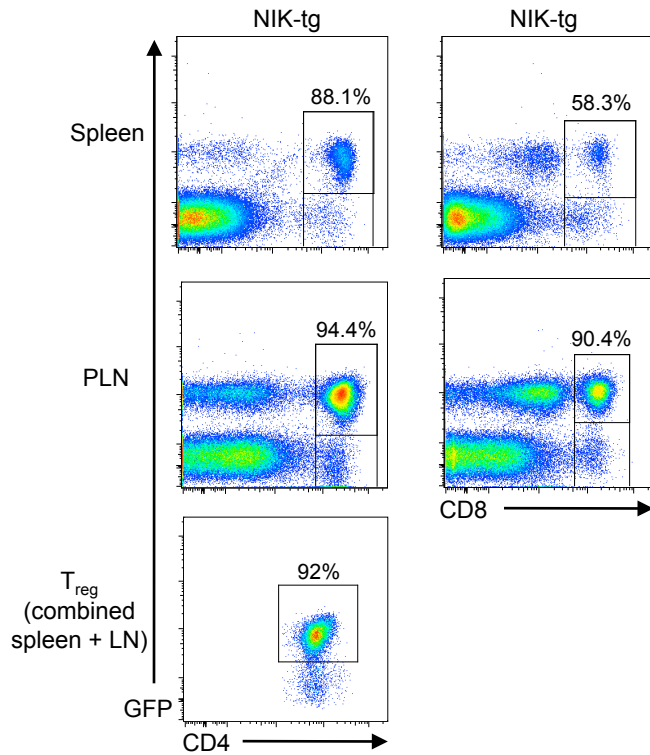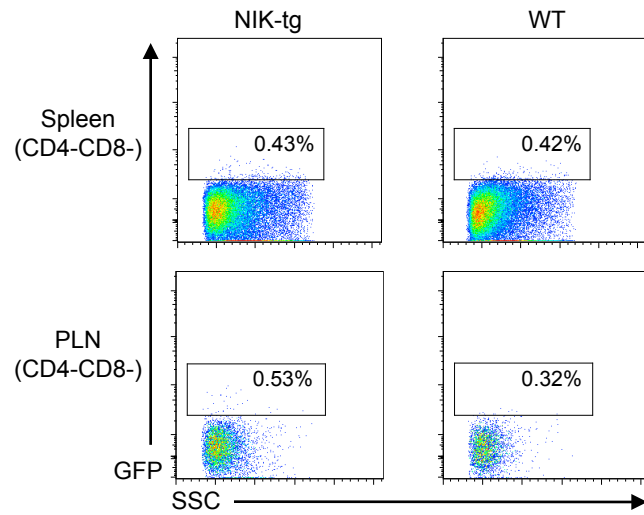

### Supplemental Figure 6

GFP expression in T cells and non-T cells from spleen and peripheral lymph node (PLN) of 11 day old CD4-NIKtg and littermate control mice. Numbers refer to the percent of gated T cells that are GFP<sup>+</sup> (upper plots) or the percent of CD4-CD8<sup>-</sup> cells that are GFP<sup>+</sup> (lower plots).

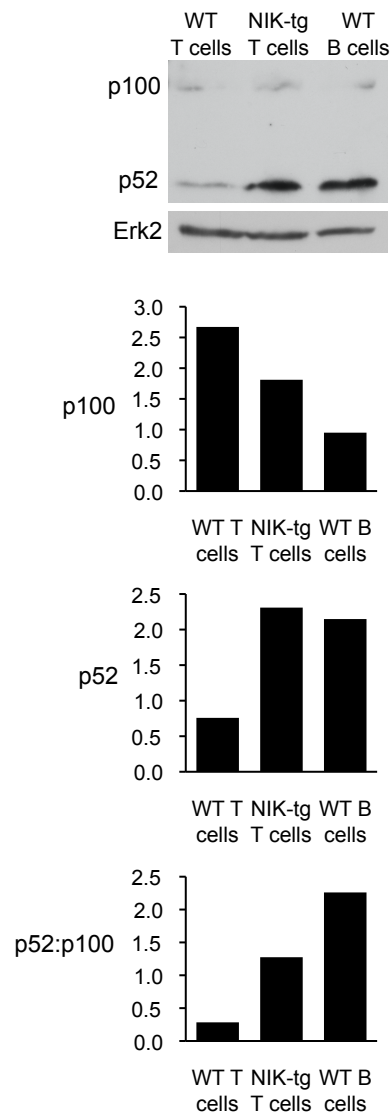

### Supplemental Figure 7

NF- $\kappa$ B2 expression and processing in peripheral CD4-NIKtg T cells. Whole cell extracts from spleen and lymph node were assessed for p100 and p52 and normalized to Erk2 loading control. WT T cells and WT B cells were purified by magnetic separation; CD4-NIKtg T cells were obtained from healthy bone marrow chimeras and sorted based on GFP and CD4/CD8 co-receptor expression.

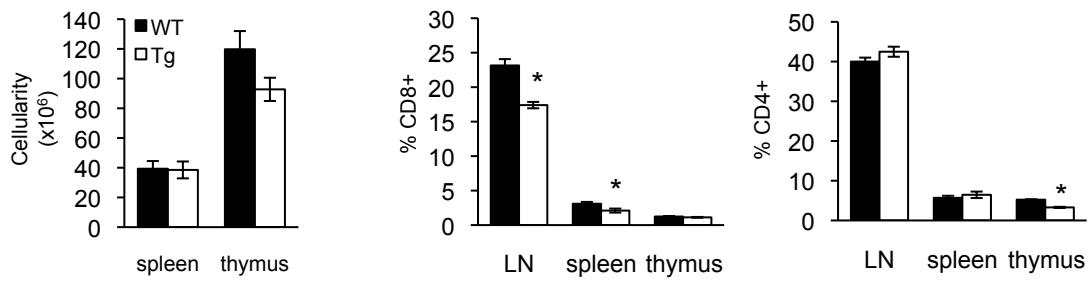

### Supplemental Figure 8

Cellularity and T cell proportions in lymphoid organs of 11 day old CD4-NIKtg and littermate control mice. \* $P < 0.05$ .



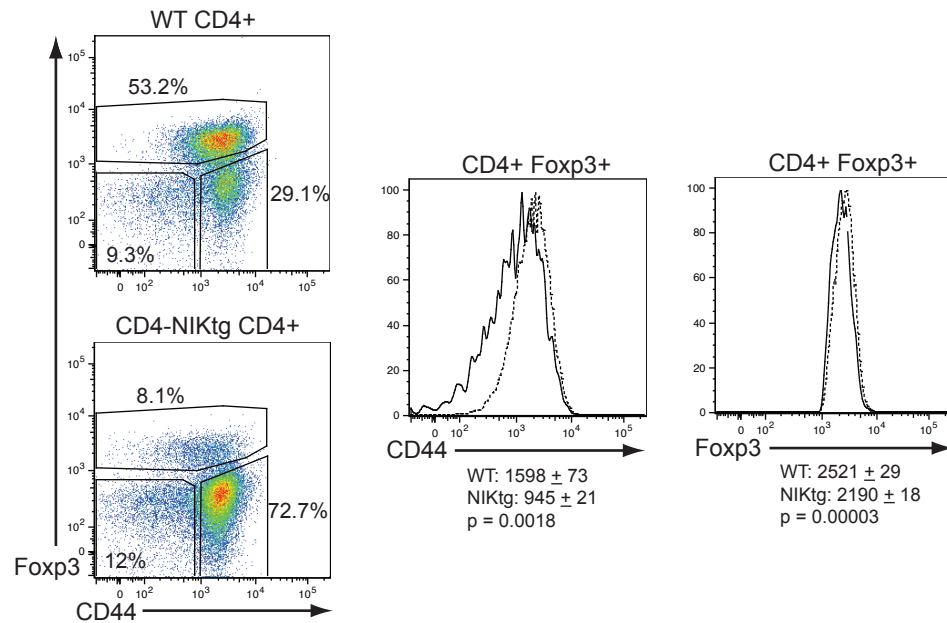

### Supplemental Figure 9

CD4-NIKtg  $T_{conv}$  are activated and WT  $T_{reg}$  are expanded in healthy mixed bone marrow chimeras. Lethally irradiated Thy1.1 recipients were reconstituted with a 1:1 mix of CD4-NIKtg and WT B6.CD45.1 bone marrow. Splenocytes from the chimeras were assessed for CD44 and Foxp3 expression. Dot plots are gated on CD4+ cells with the appropriate congenic markers. Histograms are gated on CD4+ Foxp3+ cells; dashed lines are WT and solid lines are NIKtg. Average CD44 and Foxp3 MFIs of the gated populations  $\pm$  SEM and p values (WT vs. NIKtg) are displayed underneath the histograms.

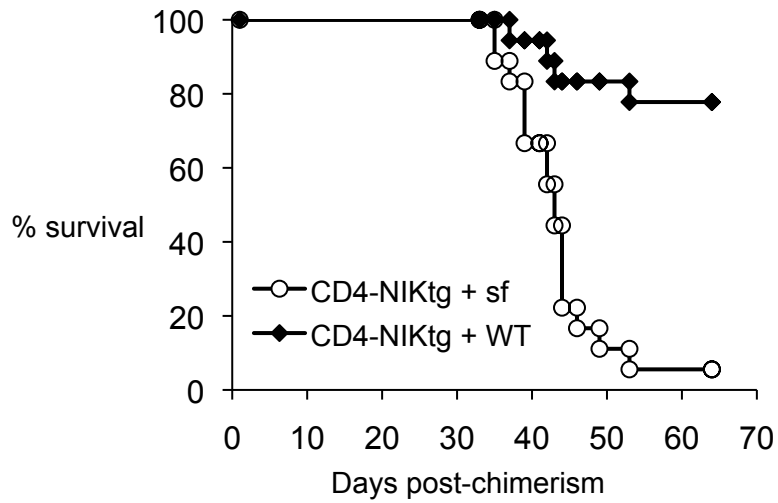

**Supplemental Figure 10**

WT, but not NIK-tg, Foxp3<sup>+</sup> T<sub>reg</sub> can rescue autoimmunity induced by T cell-specific overexpression of NIK. Rag<sup>-/-</sup> mice were reconstituted with a 1:1 mixture of CD4-NIKtg BM: WT BM or CD4-NIKtg BM: FoxP3<sup>sf</sup> BM and survival was monitored for 2 months.
